# Supplementary material
Source: PubMed Central journal article supplement (PMC8491434)

**SUPPLEMENTAL MATERIAL**

**Supplemental Table 1.** 24-Month outcomes of patients discharged on dual anti-platelet therapy after percutaneous coronary intervention compared across baseline white blood cell count (WBC) quartiles

|                                                                                                                                                                                               | WBC<br>quartile 1<br>(2.10-6.60 x<br>10 <sup>3</sup> cells/uL)<br>(n=1065) | WBC<br>quartile 2<br>(6.61-8.00 x<br>10 <sup>3</sup> cells/uL)<br>(n=1065) | WBC<br>quartile 3<br>(8.01-9.83 x<br>10 <sup>3</sup> cells/uL)<br>(n=1037) | WBC<br>quartile 4<br>(9.84-29.02 x<br>10 <sup>3</sup> cells/uL)<br>(n=1055) | P <sub>trend</sub> |
|-----------------------------------------------------------------------------------------------------------------------------------------------------------------------------------------------|----------------------------------------------------------------------------|----------------------------------------------------------------------------|----------------------------------------------------------------------------|-----------------------------------------------------------------------------|--------------------|
| Major adverse cardiovascular event<br>(composite of cardiac death, definite or<br>probable stent thrombosis, spontaneous<br>myocardial infarction, or target lesion<br>revascularization) (%) | 9.9 [8.2-11.9]                                                             | 10.2 [8.5-12.2]                                                            | 13.0 [11.1-15.3]                                                           | 14.0 [12.0-16.3]                                                            | 0.0004             |
| Cardiac death (%)                                                                                                                                                                             | 1.9 [1.2-2.9]                                                              | 3.3 [2.3-4.6]                                                              | 3.9 [2.9-5.3]                                                              | 4.0 [2.9-5.4]                                                               | 0.005              |
| Definite/probable stent thrombosis (%)                                                                                                                                                        | 1.1 [0.6-2.0]                                                              | 0.9 [0.5-1.7]                                                              | 2.1 [1.4-3.2]                                                              | 2.0 [1.3-3.0]                                                               | 0.02               |
| Spontaneous myocardial infarction (%)                                                                                                                                                         | 3.3 [2.3-4.6]                                                              | 3.4 [2.4-4.7]                                                              | 3.9 [2.8-5.3]                                                              | 4.5 [3.4-6.0]                                                               | 0.11               |
| Clinically indicated target lesion<br>revascularization (%)                                                                                                                                   | 6.6 [5.2-8.3]                                                              | 6.1 [4.8-7.8]                                                              | 8.4 [6.8-10.3]                                                             | 9.0 [7.3-10.9]                                                              | 0.007              |

Data are shown as crude estimates from Kaplan-Meier curves [95% confidence interval]

**Supplemental Table 2.** Adjusted associations between baseline white blood cell count tertiles and clinical outcomes at 24-month follow-up in patients discharged on dual anti-platelet therapy after percutaneous coronary intervention

|                                                                                                                                                                                               | WBC<br>tertile 1<br>(2.1-7.1 x 10 <sup>3</sup> cells/uL)<br>(n=1469) | WBC<br>tertile 2<br>(7.11-9.1 x 10 <sup>3</sup> cells/uL)<br>(n=1353) | p-<br>value | WBC<br>tertile 3<br>(9.11-29.0 x 10 <sup>3</sup> cells/uL)<br>(n=1400) | p-<br>value |
|-----------------------------------------------------------------------------------------------------------------------------------------------------------------------------------------------|----------------------------------------------------------------------|-----------------------------------------------------------------------|-------------|------------------------------------------------------------------------|-------------|
| Major adverse cardiovascular event<br>(composite of cardiac death, definite or<br>probable stent thrombosis, spontaneous<br>myocardial infarction, or target lesion<br>revascularization) (%) | Ref                                                                  | 1.11 (0.88-1.41)                                                      | 0.37        | 1.41 (1.11-1.78)                                                       | 0.004       |
| Cardiac death (%)                                                                                                                                                                             | Ref                                                                  | 1.57 (0.99-2.48)                                                      | 0.05        | 1.85 (1.17-2.93)                                                       | 0.009       |
| Definite/probable stent thrombosis (%)                                                                                                                                                        | Ref                                                                  | 1.17 (0.56-2.47)                                                      | 0.68        | 1.65 (0.81-3.35)                                                       | 0.17        |
| Spontaneous myocardial infarction (%)                                                                                                                                                         | Ref                                                                  | 0.96 (0.63-1.47)                                                      | 0.87        | 1.31 (0.86-1.97)                                                       | 0.21        |
| Clinically indicated target lesion<br>revascularization (%)                                                                                                                                   | Ref                                                                  | 1.11 (0.82-1.50)                                                      | 0.49        | 1.40 (1.04-1.89)                                                       | 0.028       |

Data shown as Hazard Ratio (95% confidence interval)

Model adjusts for the following variables: age, sex, body mass index, dyslipidemia, hypertension, diabetes mellitus, prior coronary artery disease, tobacco use, admission aspirin use, admission thienopyridine use, glycoprotein IIb/IIIa use, acute coronary syndrome presentation, presence of thrombotic lesion, stent type, stent length, mode of dual antiplatelet therapy cessation, and study site.

**Supplemental Table 3.** Other multivariable predictors of major adverse cardiovascular events at 24 months follow-up in patients discharged on dual anti-platelet therapy after percutaneous coronary intervention

|                                                          | Hazard Ratio | 95%<br>Confidence Interval | p-value |
|----------------------------------------------------------|--------------|----------------------------|---------|
| Diabetes                                                 | 1.56         | 1.29-1.89                  | <0.001  |
| Prior coronary artery disease                            | 1.70         | 1.37-2.11                  | <0.001  |
| Acute coronary syndrome                                  | 1.28         | 1.02-1.61                  | 0.03    |
| Total stent length $\geq$ 40 mm                          | 1.38         | 1.10-1.75                  | 0.006   |
| Use of 1 <sup>st</sup> generation drug-eluting stent     | 0.63         | 0.44-0.89                  | 0.01    |
| Use of 2 <sup>nd</sup> generation drug-eluting stent     | 0.56         | 0.43-0.73                  | <0.001  |
| Disruption of dual antiplatelet therapy                  | 1.58         | 1.17-2.14                  | 0.003   |
| Recommended discontinuation of dual antiplatelet therapy | 0.68         | 0.47-0.99                  | 0.04    |

**Supplemental Figure.** Kaplan-Meier Curves of Major Adverse Cardiovascular Events Through 24 Months Stratified by Quartiles of Baseline White Blood Cell Count

**Supplemental Figure.**

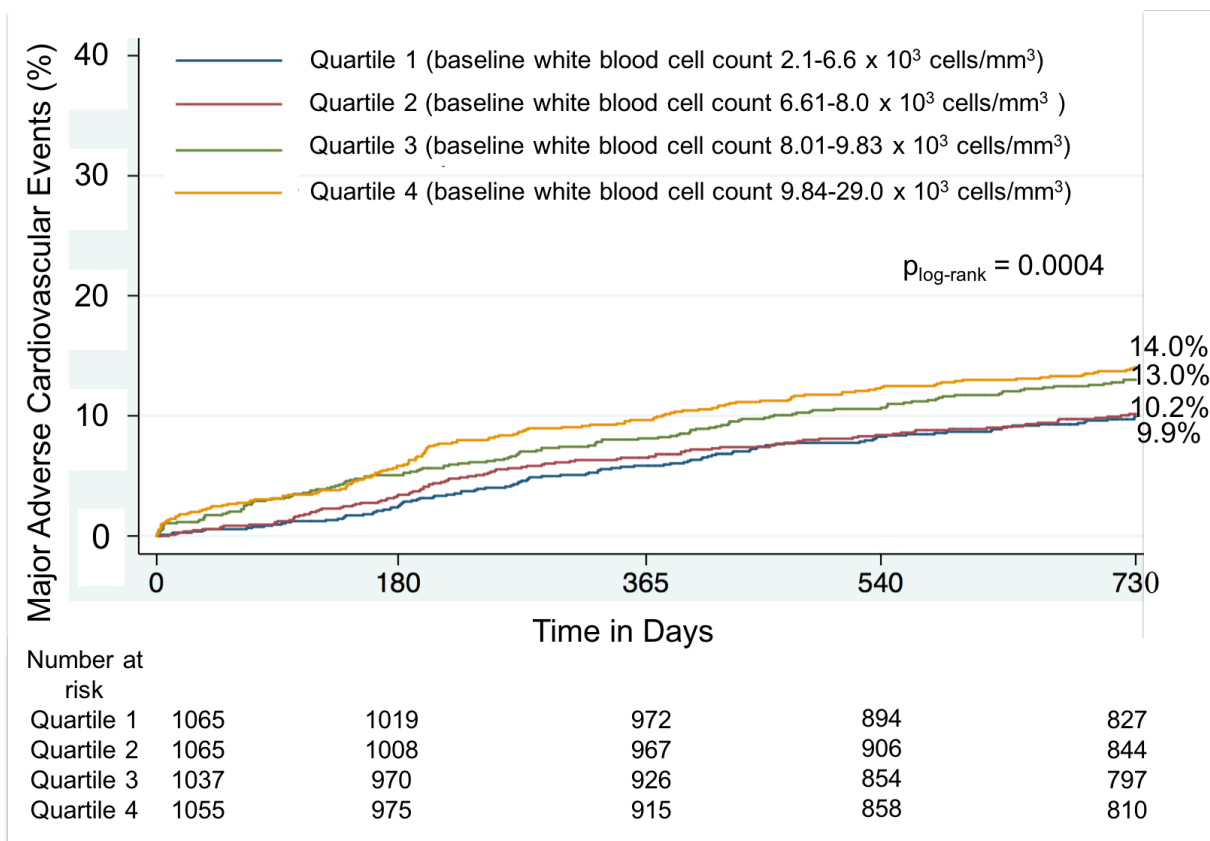

Supplement: NIHMS1742013-supplement-Supplementary_material.pdf [file NIHMS1742013-supplement-Supplementary_material.pdf]
